# Supplementary material for: Explainable optimized 3D-MoRSE descriptors for the power conversion efficiency prediction of molecular passivated perovskite solar cells through machine learning
Source: Royal Society of Chemistry journal article supplement (doi:10.1039/d4ta03547j), 2024-01-01
Supplement: d4ta03547j1.pdf [file d4ta03547j1.pdf]

# Supplementary Information for

## Explainable Optimized 3D-MoRSE Descriptors for the Power Conversion Efficiency Prediction of Molecular Passivated Perovskite Solar Cells Through Machine Learning

*Xin Ye, Ningyi Cui, Wen Ou, Donghua Liu, Yufan Bao, Bin Ai\*, Yecheng Zhou\**

*Guangzhou Key Laboratory of Flexible Electronic Materials and Wearable Devices*

*School of Materials Science & Engineering, Sun Yat-sen University, Guangzhou 510006, Guangdong, People's Republic of China.*

*E-mail address: stsab@mail.sysu.edu.cn (B. Ai), zhouych29@mail.sysu.edu.cn (Y. Zhou)*

### Contents

1. **Fig. S1~S5** The morU descriptors calculated with different scale factors.
2. **Fig. S6** Standard 3D-MoRSE radial basis function  $f(s, r_{ij})$  at different scattering parameters.
3. **Fig. S7~S8** The RMSE versus  $s_L$ -s heatmap of morE and morIP descriptor sets.
4. **Fig. S9~S10** The bar plot and scatter plot of 100 times fitting with 30% samples as the test set.
5. **Fig. S11** The bar plot and scatter plot of ML result based on morX (0.1,14) with the LOO method.
6. **Fig. S12~S14** The RMSE heatmap to optimized  $s_L$ -s with ARD regression and LOO method.
7. **Fig. S15** The SHAP summary plot for ARD models based on morX (0.1,14) and E-C.
8. **Fig. S16** The key descriptor value of morU (0.21, 38).
9. **Fig. S17** Using optimized 3D-MoRSE to predict the adsorption energy and transferred charge of the molecule on a PVK surface.
10. **Fig. S18~S19** The result of morSel-1 and morSel-2
11. **Fig. S20** The PCE prediction with graph neural network model.
12. **Table S1** Molecular descriptor sets and their abbreviations.
13. **Table S2** Prediction  $R^2$ , RMSE, and r for all molecular descriptors using ARD regression.
14. **Table S3** The optimized hyperparameters for all ML processes.
15. **Table S4** The result with the LOO method and RF, ARD, ARD, and LASSO algorithms.
16. **Table S5** The result predicted by morIP (0.1,22) and added molecular descriptors.

17. **Table S6** The prediction of values of molecular descriptors by optimized 3D-MoRSE descriptors.

**Table S1** Molecular descriptor sets and their abbreviations.

| Abbr. | Illustration / weight of atoms (A)                            | Abbr.  | Illustration / weight of atoms (A)                   |
|-------|---------------------------------------------------------------|--------|------------------------------------------------------|
| E-C   | E-state index and cheminformatics from reference <sup>2</sup> | 3DM-U  | 3D MoRSE, A = 1.0                                    |
|       |                                                               | 3DM-E  | 3D MoRSE, A=atomic Sanderson electronegativity       |
| morRC | A = atomic covalent radius                                    | 3DM-IP | 3D MoRSE, A=atomic ionization potential <sup>4</sup> |
| morU  | A = 1.0                                                       | morIS  | A = atomic intrinsic state <sup>3</sup>              |
| morE  | A = atomic Sanderson electronegativity                        | morIP  | A = atomic ionization potential <sup>4</sup>         |
| morC  | A = atomic charge                                             | morCa  | A =   atomic charge                                  |
| morV  | A = atomic van der Waals volume                               | morPI  | A = atomic $\pi$ electrons                           |
| morM  | A = atomic mass                                               | morZV  | A = atomic valence electrons                         |
| morP  | A = atomic polarizability                                     | morZC  | A = (atomic valence electrons) – (atomic charge)     |

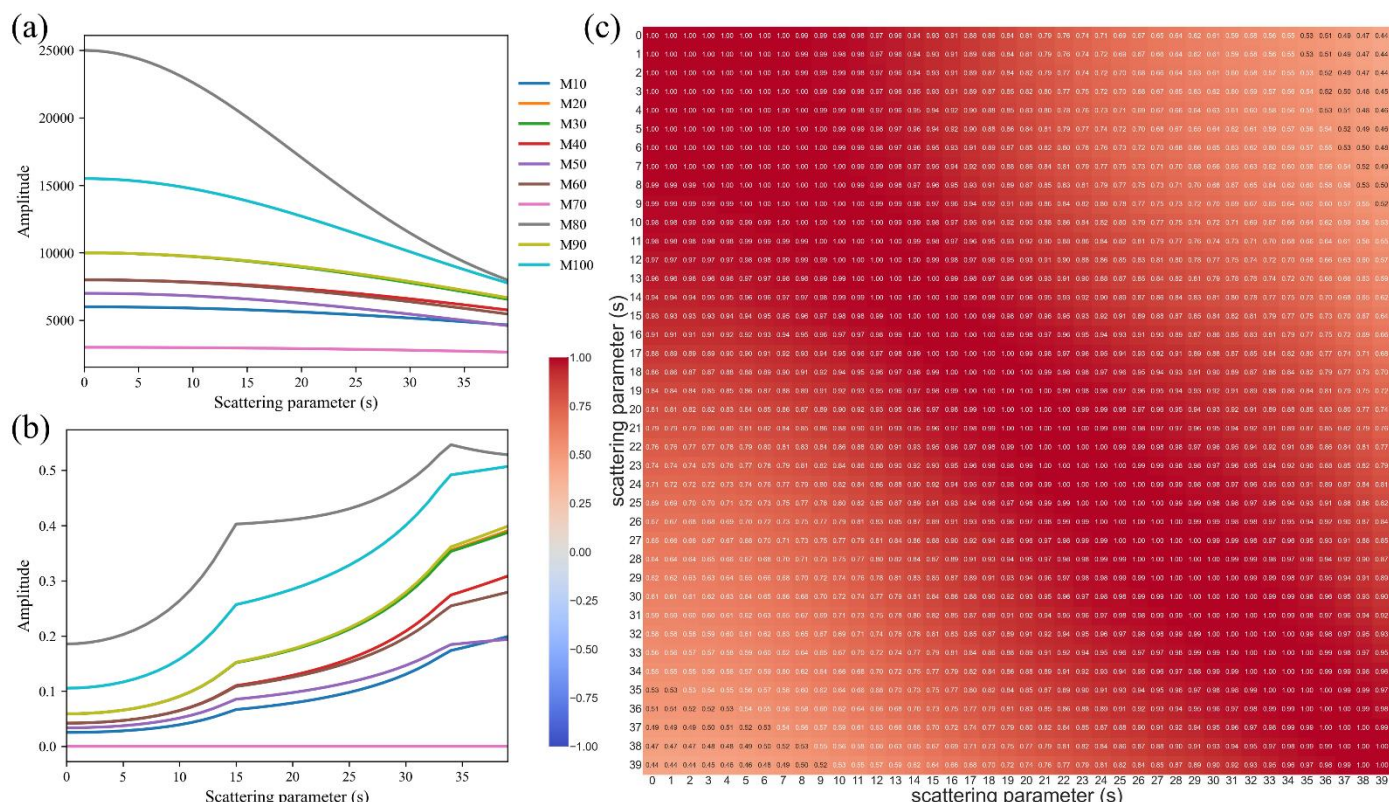

**Fig. S1** (a) The morU descriptors calculated with the scale factor of 0.01 on ten example molecules, and (b) scaled with MinMaxScaler. (c) The Pearson correlation coefficient of the whole descriptor set.

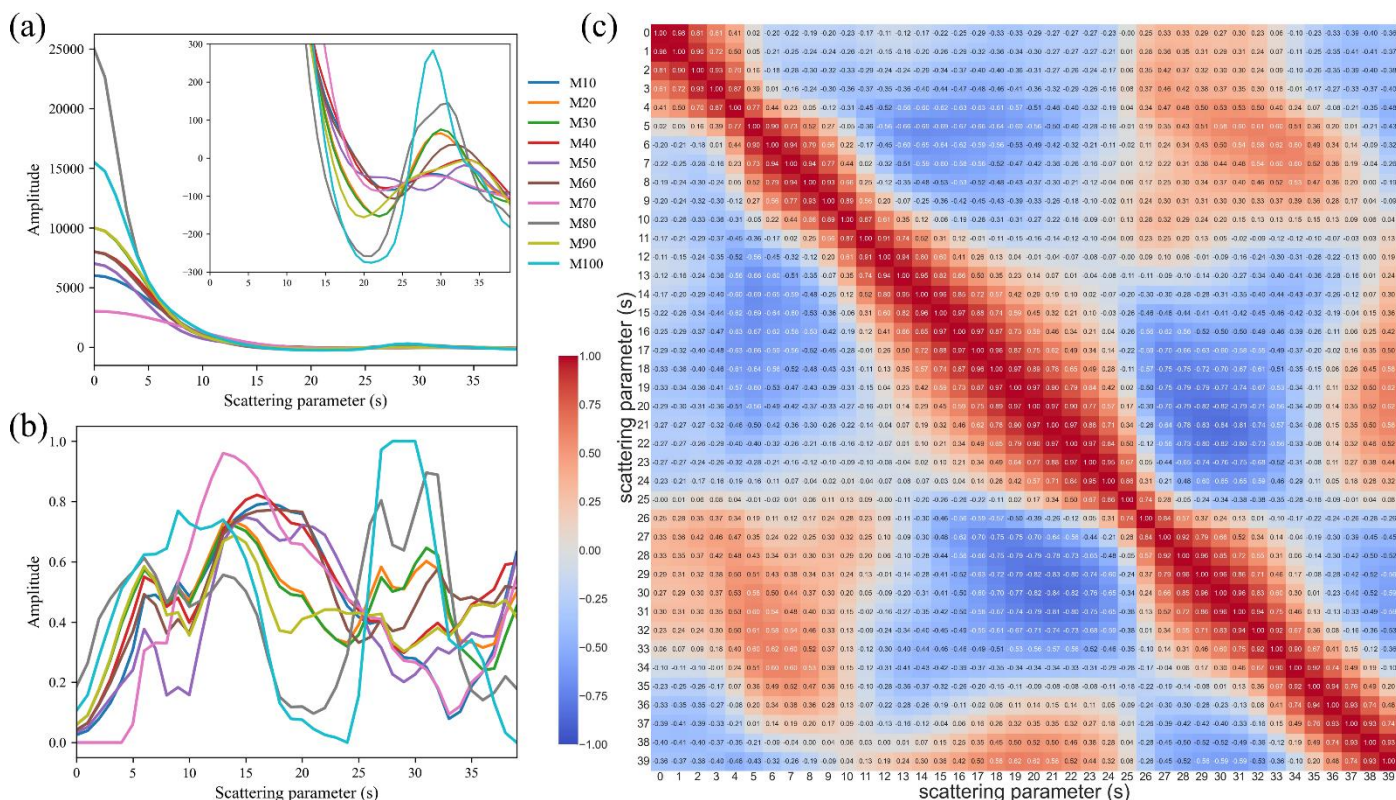

**Fig. S2** (a) The morU descriptors calculated with the scale factor of 0.1 on ten example molecules, and (b) scaled with MinMaxScaler. (c) The Pearson correlation coefficient of the whole descriptor set.

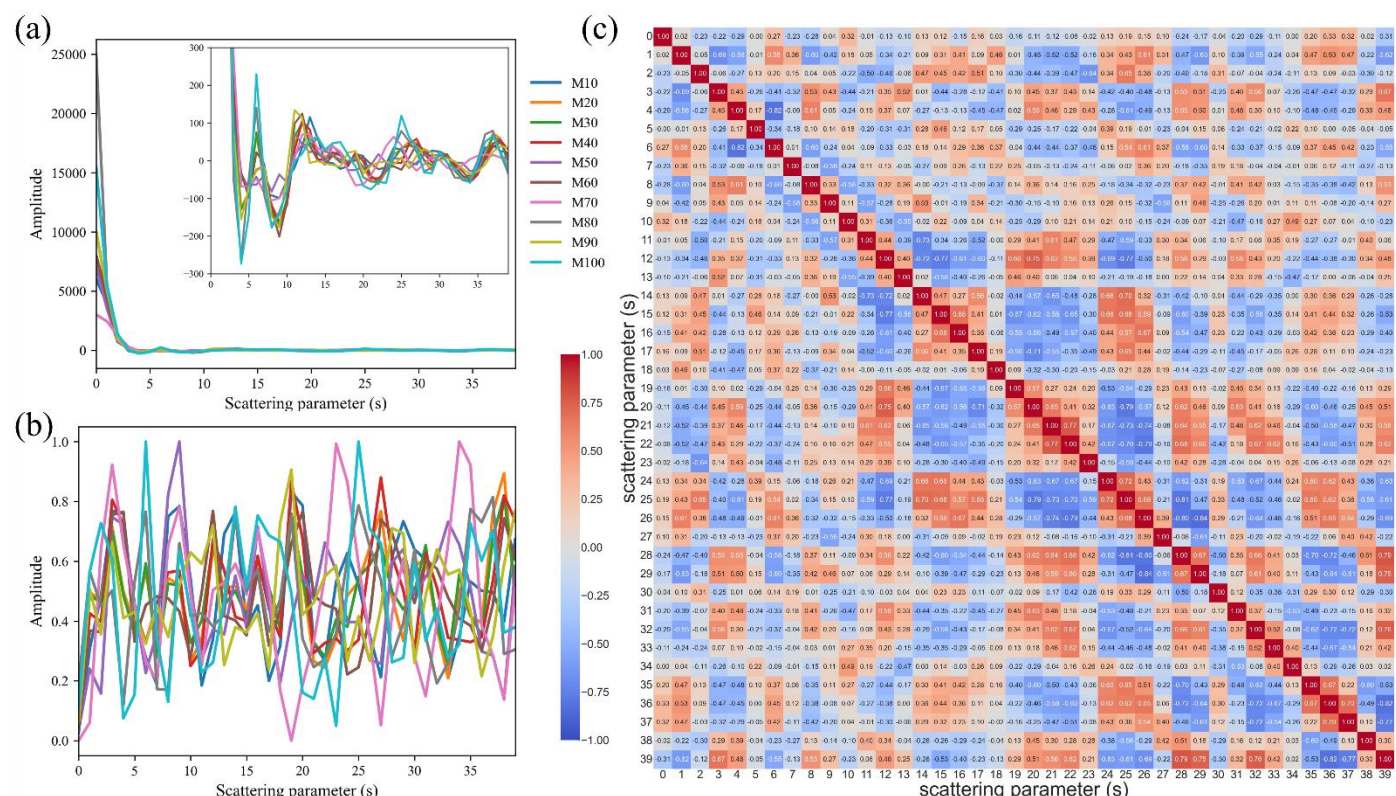

**Fig. S3** (a) The morU descriptors calculated with the scale factor of 0.5 on ten example molecules, and (b) scaled with MinMaxScaler. (c) The Pearson correlation coefficient of the whole descriptor set.

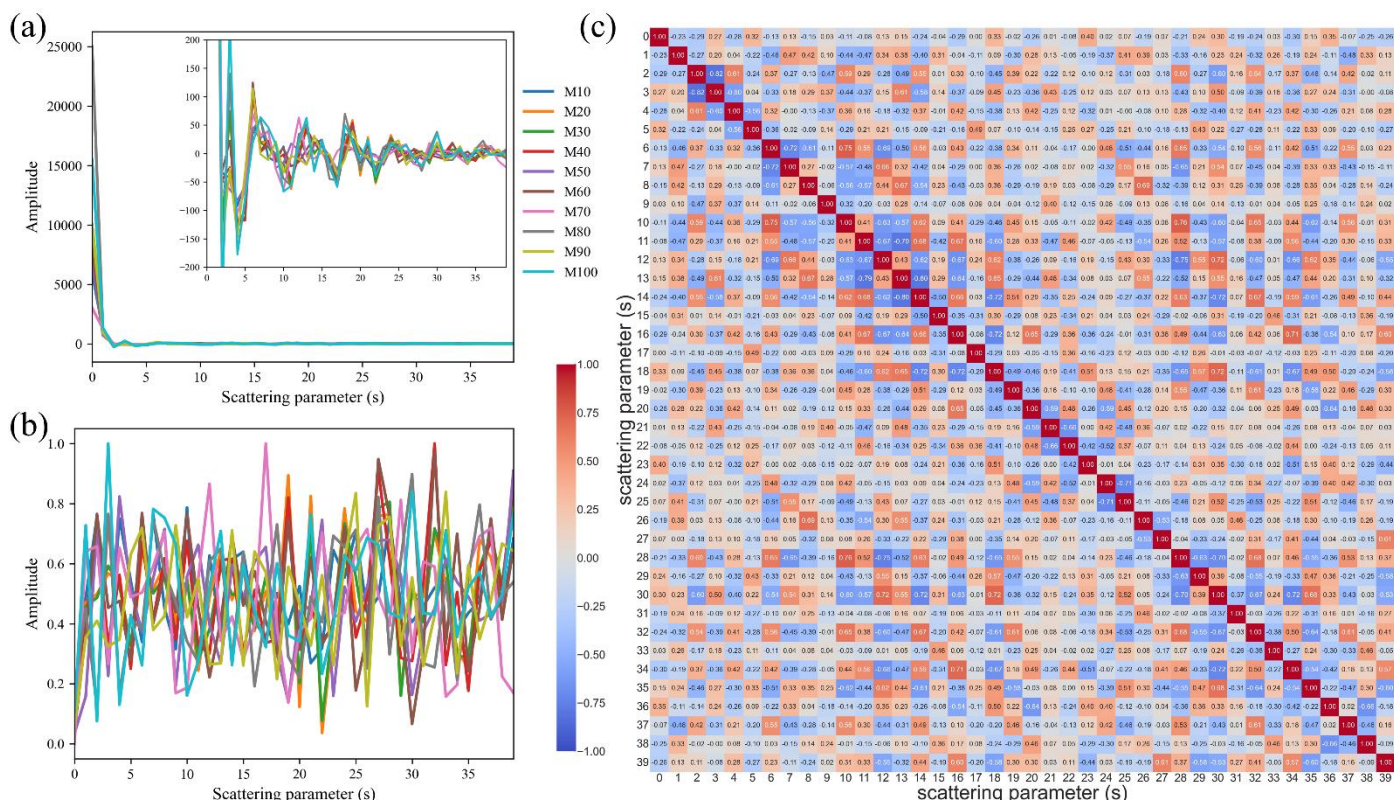

**Fig. S4** (a) The morU descriptors calculated with the scale factor of 1 on ten example molecules, and (b) scaled with MinMaxScaler. (c) The Pearson correlation coefficient of the whole descriptor set.

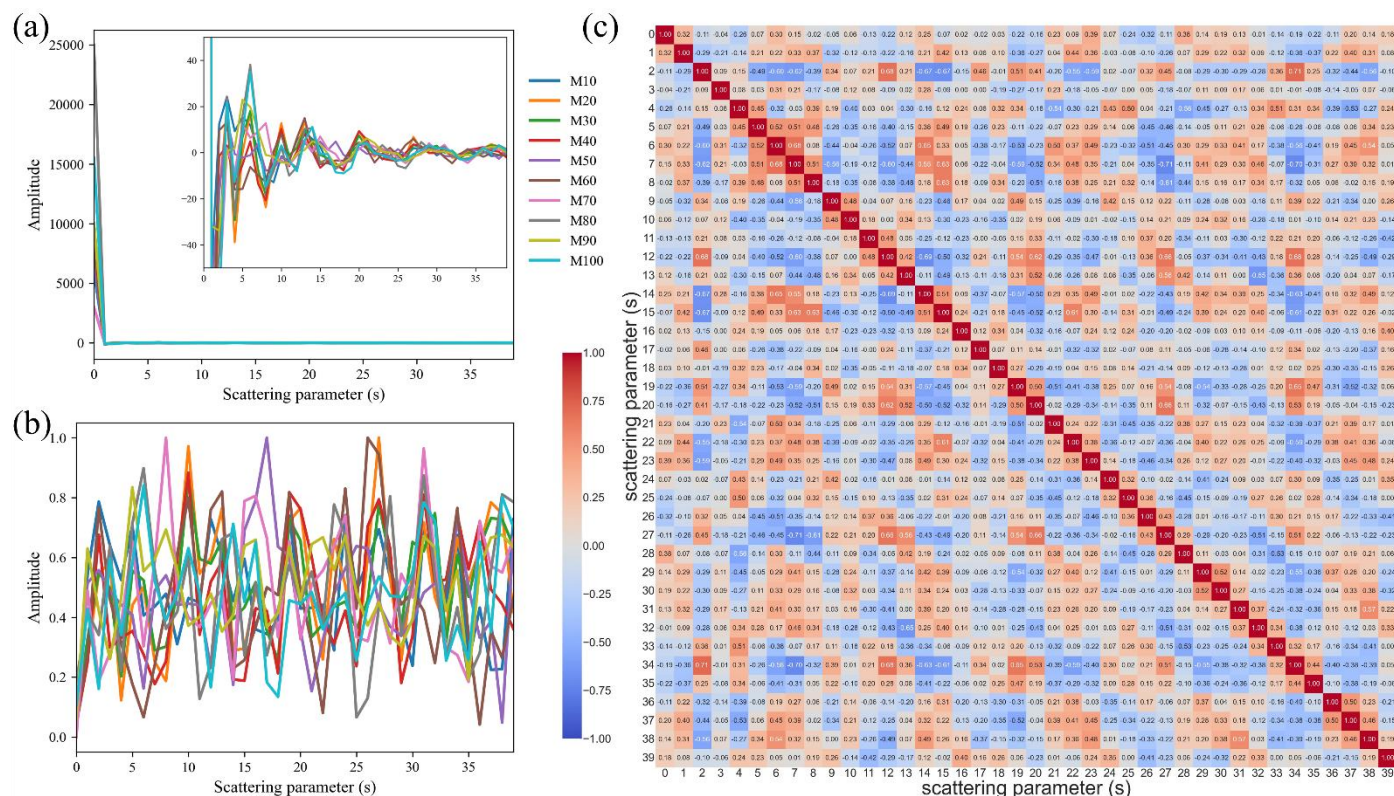

**Fig. S5** (a) The morU descriptors calculated with the scale factor of 5 on ten example molecules, and (b) scaled with MinMaxScaler. (c) The Pearson correlation coefficient of the whole descriptor set.

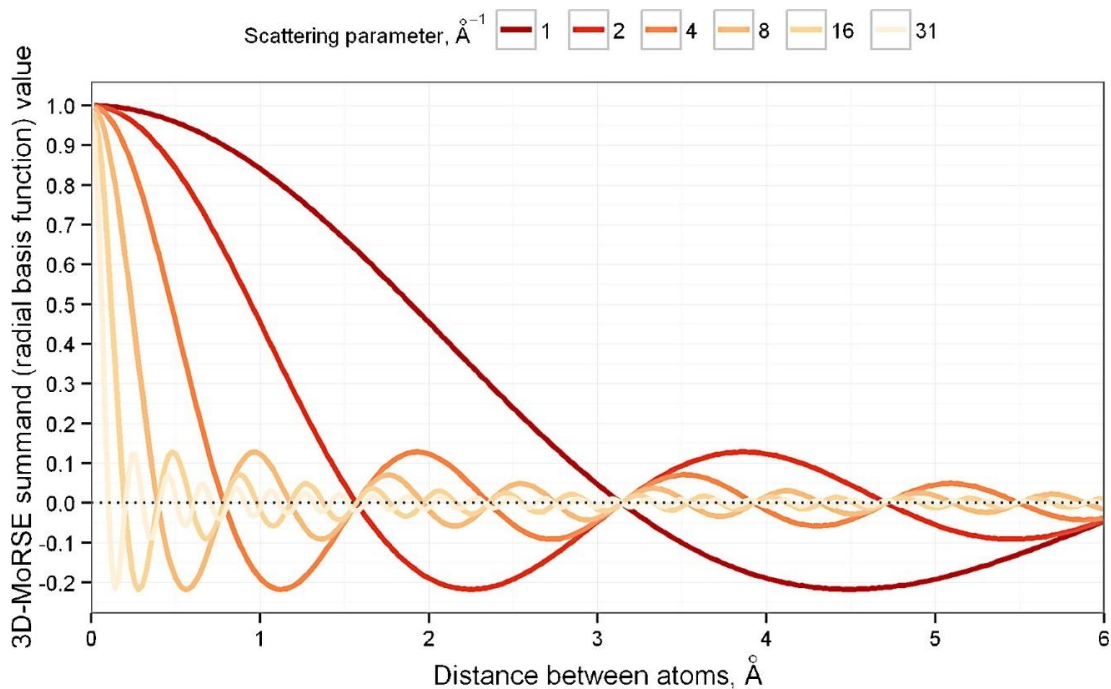

**Fig. S6** Standard 3D-MoRSE radial basis function  $f(s, r_{ij})$  at different scattering parameters.<sup>1</sup>

**Table S2** Prediction  $R^2$ , RMSE, and  $r$  for all molecular descriptors using ARD regression. For thirteen optimized 3D-MoRSE descriptors, the  $s_L$  was consistently set to 0.1 and the  $s$  ranged from 0 to 14.

| Descriptor | $R^2$ | RMSE (%) | $r$  | Descriptor  | $R^2$ | RMSE (%) | $r$  |
|------------|-------|----------|------|-------------|-------|----------|------|
| E-C + PVK  | 0.72  | 0.73     | 0.87 | morRC + PVK | 0.69  | 0.77     | 0.85 |
| morU + PVK | 0.74  | 0.70     | 0.87 | morIS + PVK | 0.70  | 0.76     | 0.86 |
| morE + PVK | 0.76  | 0.68     | 0.89 | morIP + PVK | 0.75  | 0.69     | 0.88 |
| morC + PVK | 0.69  | 0.76     | 0.85 | morCa + PVK | 0.69  | 0.76     | 0.85 |
| morV + PVK | 0.69  | 0.77     | 0.85 | morPI + PVK | 0.69  | 0.77     | 0.85 |
| morM + PVK | 0.66  | 0.80     | 0.84 | morZV + PVK | 0.69  | 0.76     | 0.85 |
| morP + PVK | 0.70  | 0.76     | 0.85 | morZC + PVK | 0.69  | 0.76     | 0.85 |
| PVK only   | 0.70  | 0.76     | 0.86 | CPCE only   | 0.67  | 0.80     | 0.84 |

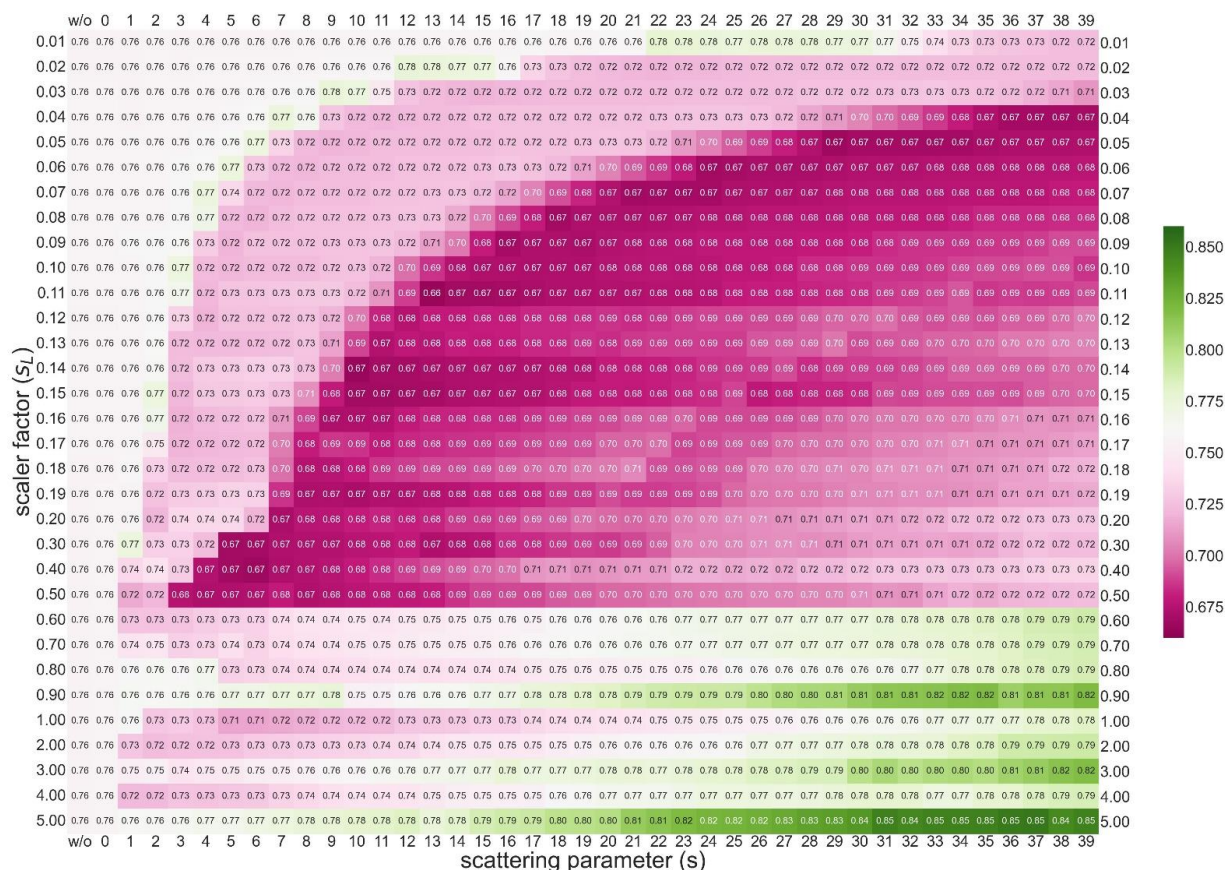

**Fig. S7** The RMSE of PCE prediction implemented with ARD regression and morE descriptor set with different dimensions that  $s$  ranges from 0 to  $x$  ( $x \leq 39$ ). The w/o means only PVK descriptors are used.

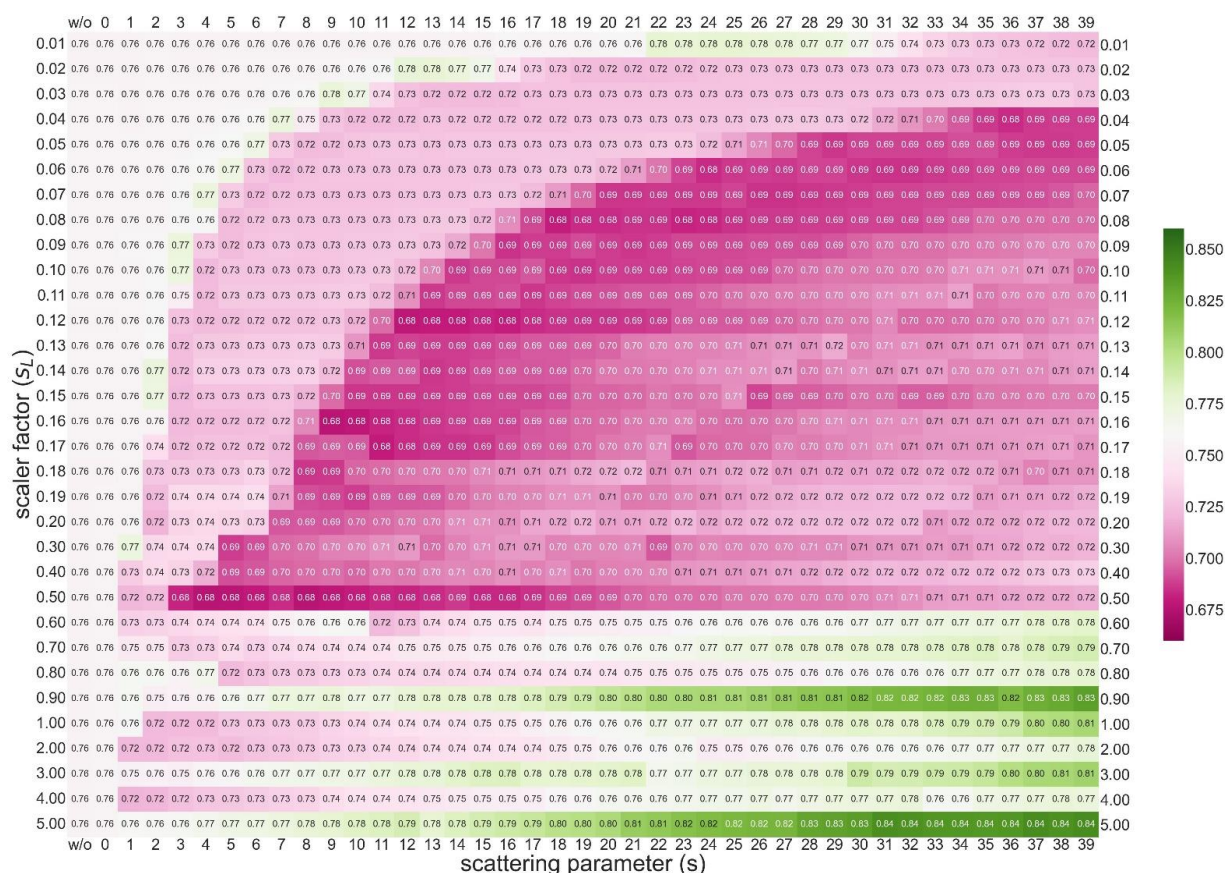

**Fig. S8** The RMSE of PCE prediction implemented with ARD regression and morIP descriptor set with different dimensions that  $s$  ranges from 0 to  $x$  ( $x \leq 39$ ). The w/o means only PVK descriptors are used.

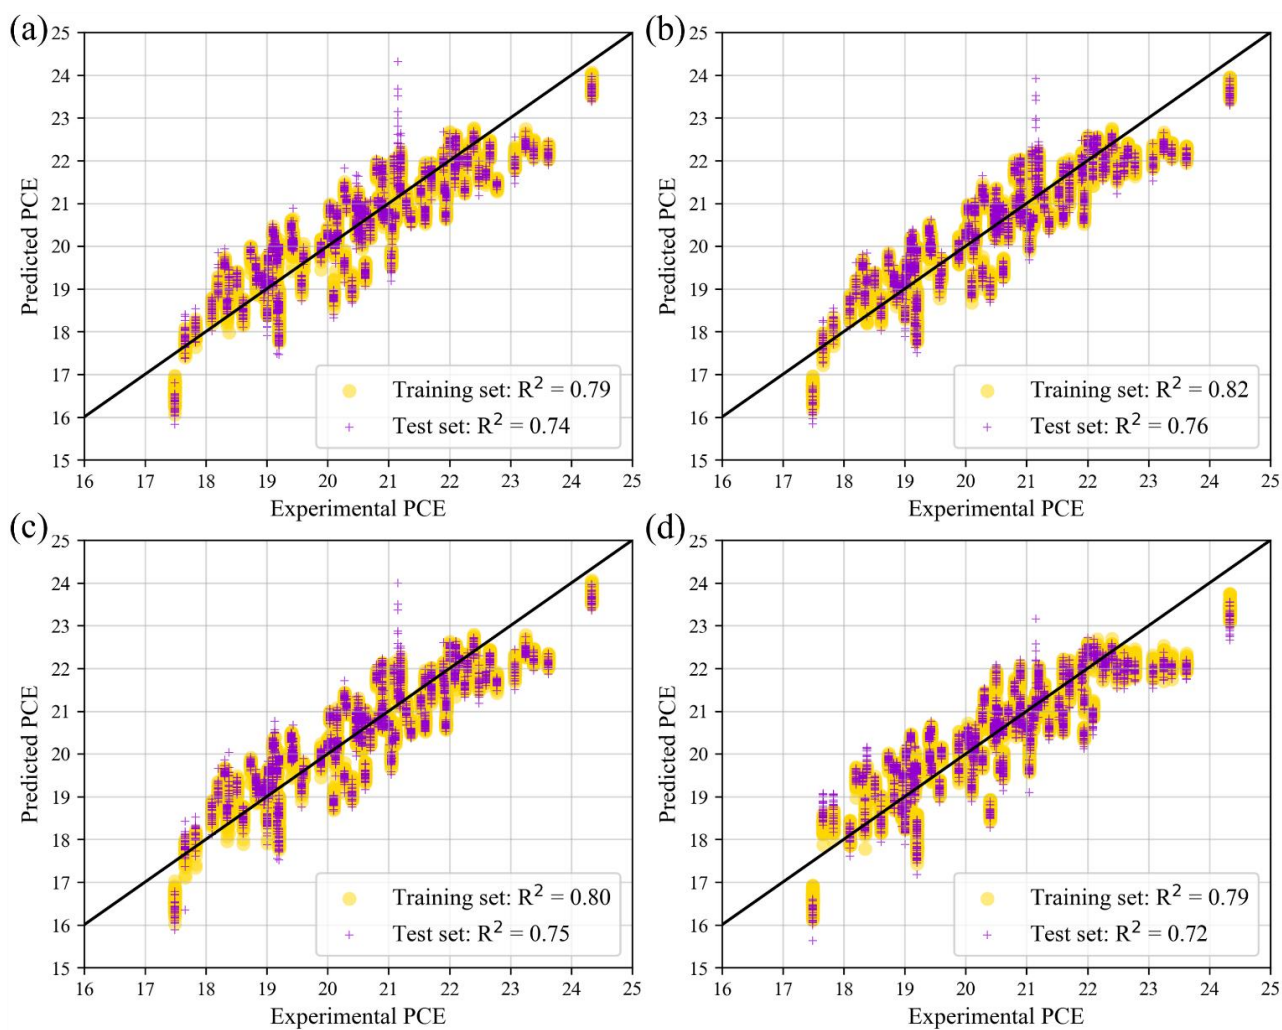

**Fig. S9** ML-predicted PCE versus experimental PCE with ARD regression based on (a) morU (0.1,14), (b) morE (0.1,14), (c) morIP (0.1,14), and (d) E-C.

**Table S3** The optimized hyperparameters for all ML processes.

| M-Des                         | Algorithm | Hyperparameters                                                         |
|-------------------------------|-----------|-------------------------------------------------------------------------|
| E-C                           | RF        | min_samples_leaf=1, min_samples_split=6, max_depth=7, n_estimators=200  |
|                               | SVR       | C=18, gamma=0.21, epsilon=0.2                                           |
|                               | ARD       | default                                                                 |
|                               | LASSO     | alpha=0.012                                                             |
| morX (0.1,14)<br>(X=U, E, IP) | RF        | min_samples_leaf=1, min_samples_split=2, max_depth=5, n_estimators=200  |
|                               | SVR       | C=28, gamma=0.12, epsilon=0.74                                          |
|                               | ARD       | default                                                                 |
|                               | LASSO     | alpha=0.004                                                             |
| morX (0.5,14)                 | ARD       | default                                                                 |
| morU (0.21,38)                | RF        | min_samples_leaf=1, min_samples_split=2, max_depth=10, n_estimators=200 |
|                               | SVR       | C=18, gamma=0.15, epsilon=0.15                                          |
|                               | ARD       | default                                                                 |
|                               | LASSO     | alpha=0.003                                                             |
| morE (0.38,16)                | RF        | min_samples_leaf=1, min_samples_split=2, max_depth=10, n_estimators=200 |
|                               | SVR       | C=27, gamma=0.30, epsilon=0.22                                          |
|                               | ARD       | default                                                                 |
|                               | LASSO     | alpha=0.002                                                             |
| morIP (0.40,22)               | RF        | min_samples_leaf=1, min_samples_split=2, max_depth=10, n_estimators=200 |
|                               | SVR       | C=37, gamma=0.03, epsilon=0.13                                          |
|                               | ARD       | default                                                                 |
|                               | LASSO     | alpha=0.003                                                             |

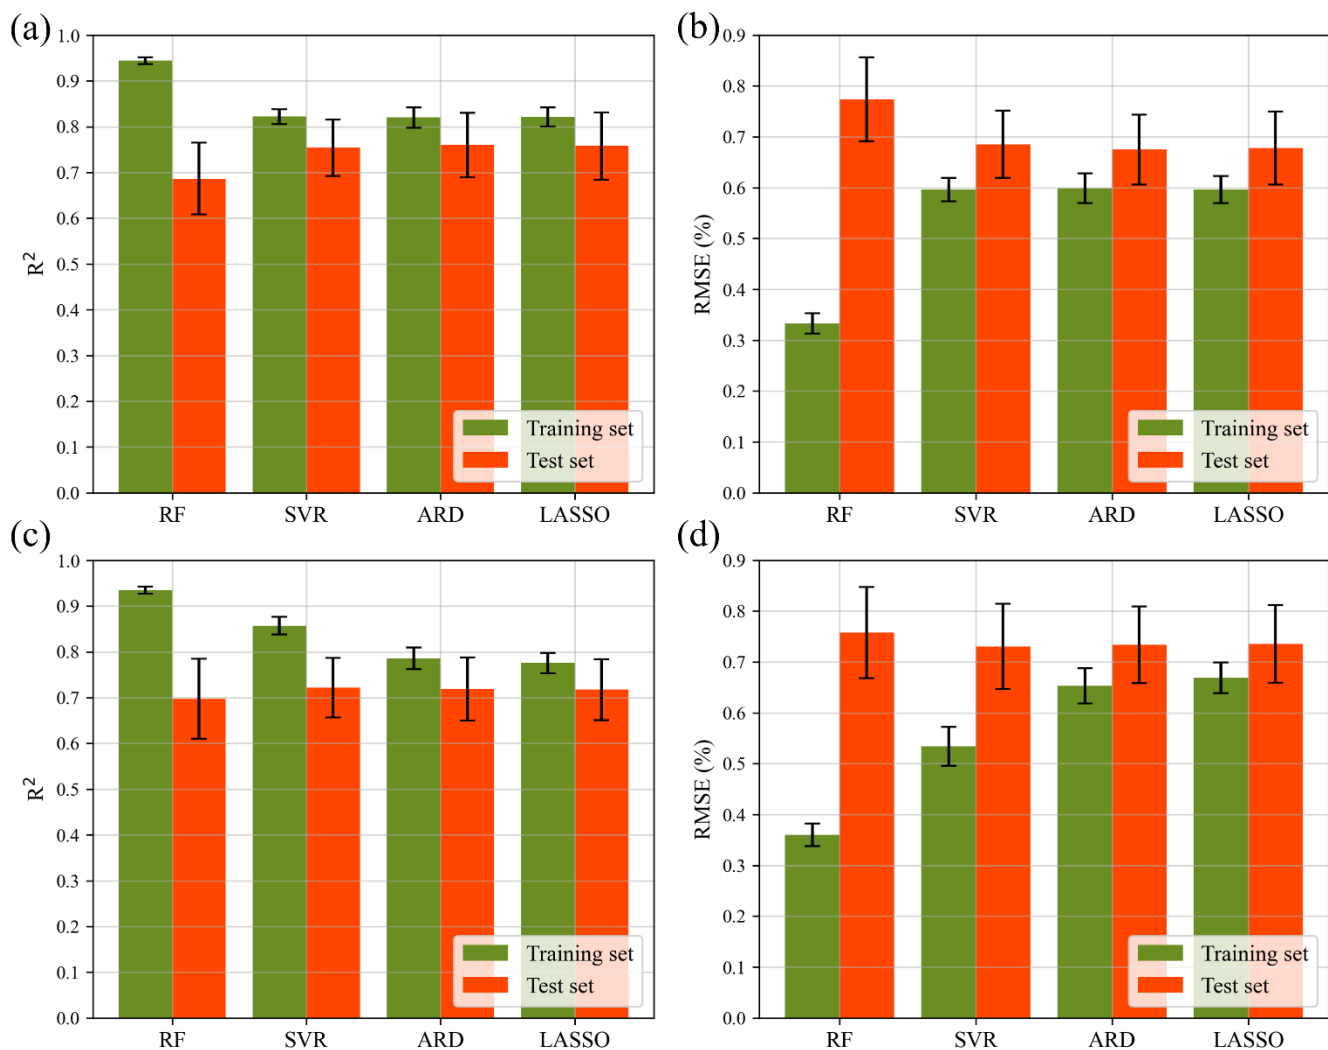

**Fig. S10** The training and test RMSE and  $R^2$  based on (a-b) morE (0.1,14) and (c-d) E-C. The test set sampled by 30% from the entire database is mutually exclusive with the training set.

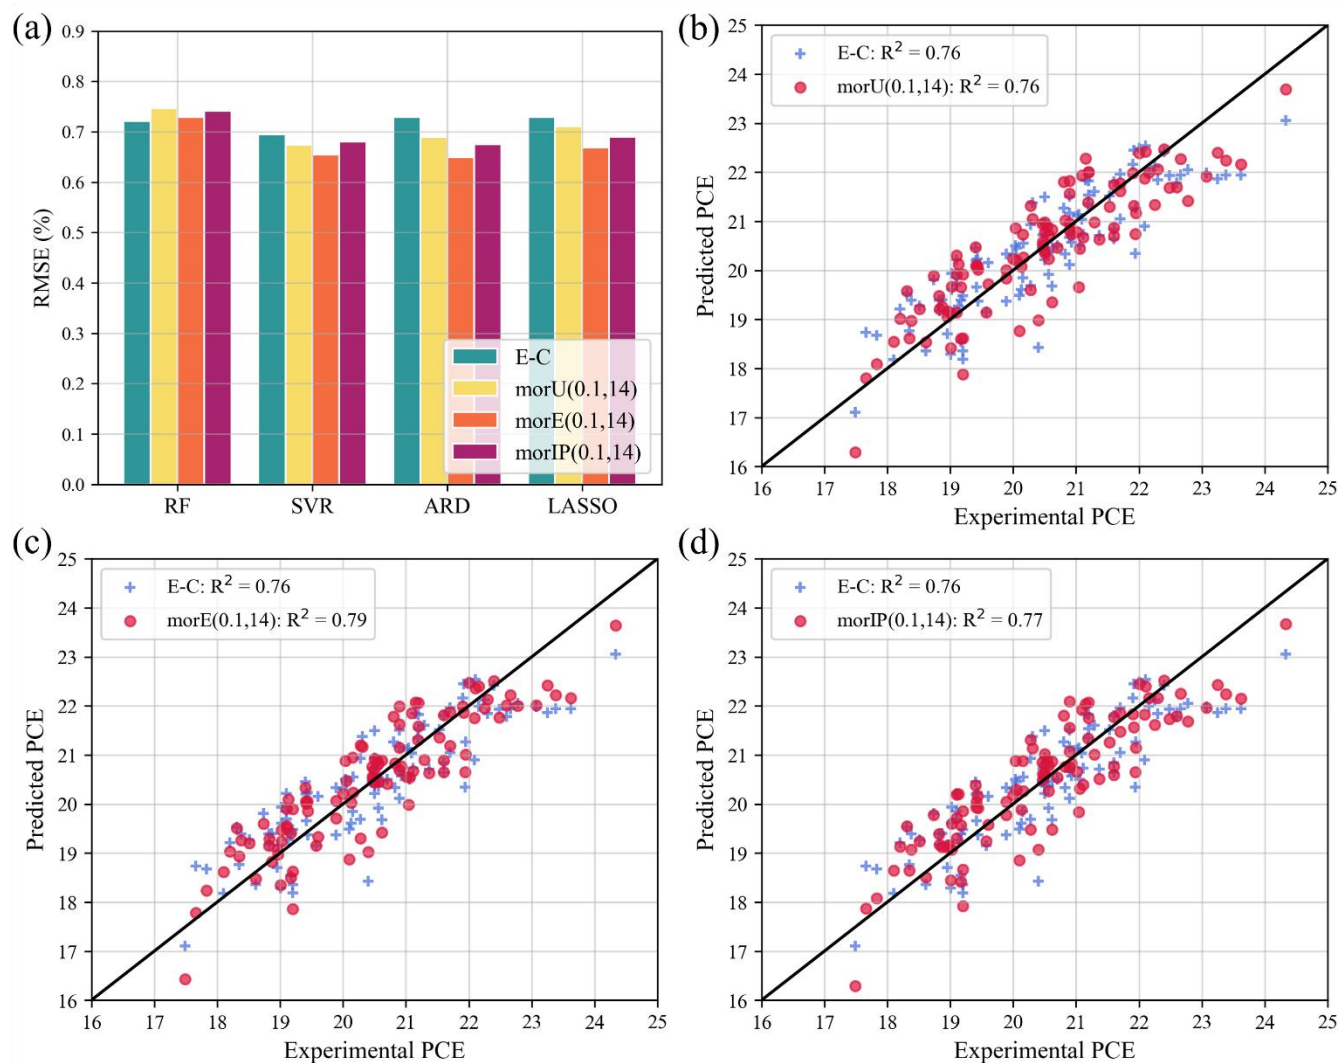

**Fig. S11** (a) The RMSE of ML based on different algorithms including RF, SVR, ARD, and LASSO with the LOO method. (b-d) ML-predicted PCE versus experimental PCE based on the LOO method, where ARD regression for optimized 3D-MoRSE descriptors and SVR for E-C.



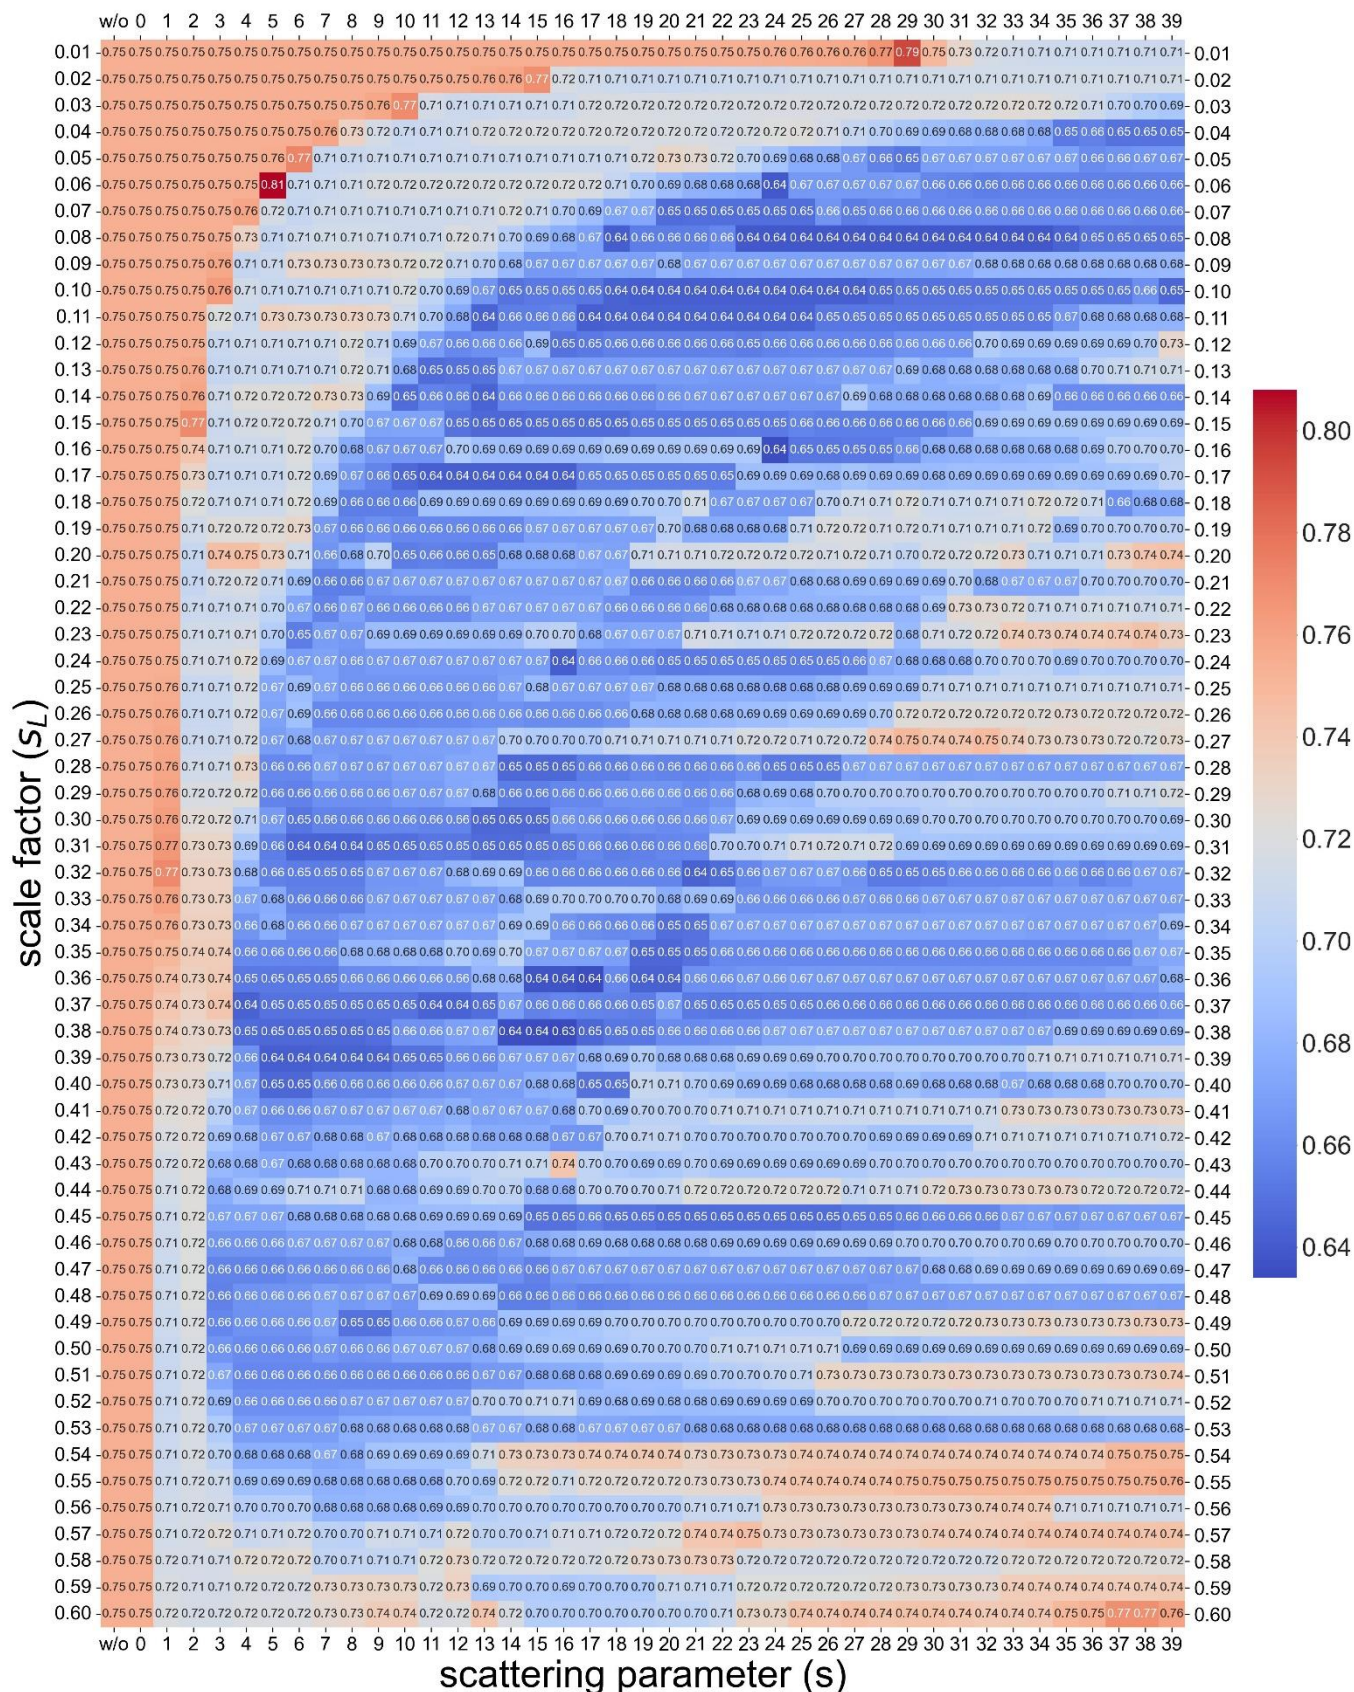

**Fig. S13** The RMSE of PCE prediction implemented with ARD regression and morE descriptor set with  $s_L$  from 0.01 to 0.60 and dimensions from 0 (w/o) to 40 ( $s = 39$ ).



**Table S4** The result with RF, ARD, ARD, and LASSO algorithms for morX with the best-optimized  $s$  and  $s_L$ , for morX(0.1,14), and for E-C. The LOO method and data split method (Test set: 30%) were utilized, respectively.

| Algorithm | M-Des           | LOO            |          |      | Test set: 30%  |          |      |
|-----------|-----------------|----------------|----------|------|----------------|----------|------|
|           |                 | R <sup>2</sup> | RMSE (%) | r    | R <sup>2</sup> | RMSE (%) | r    |
| RF        | morU (0.1,14)   | 0.72           | 0.75     | 0.85 | 0.68           | 0.79     | 0.84 |
|           | morE (0.1,14)   | 0.74           | 0.73     | 0.86 | 0.68           | 0.77     | 0.85 |
|           | morIP (0.1,14)  | 0.73           | 0.74     | 0.85 | 0.68           | 0.78     | 0.85 |
|           | morU (0.21,38)  | 0.70           | 0.78     | 0.84 | 0.65           | 0.82     | 0.83 |
|           | morE (0.38,16)  | 0.71           | 0.77     | 0.84 | 0.66           | 0.81     | 0.83 |
|           | morIP (0.40,22) | 0.70           | 0.78     | 0.84 | 0.66           | 0.80     | 0.83 |
|           | E-C             | 0.74           | 0.72     | 0.86 | 0.70           | 0.76     | 0.85 |
| SVR       | morU (0.1,14)   | 0.77           | 0.67     | 0.88 | 0.73           | 0.71     | 0.87 |
|           | morE (0.1,14)   | 0.79           | 0.66     | 0.89 | 0.75           | 0.69     | 0.88 |
|           | morIP (0.1,14)  | 0.77           | 0.68     | 0.88 | 0.74           | 0.70     | 0.87 |
|           | morU (0.21,38)  | 0.77           | 0.68     | 0.88 | 0.69           | 0.77     | 0.85 |
|           | morE (0.38,16)  | 0.79           | 0.65     | 0.89 | 0.72           | 0.73     | 0.86 |
|           | morIP (0.40,22) | 0.78           | 0.66     | 0.89 | 0.73           | 0.72     | 0.87 |
|           | E-C             | 0.76           | 0.69     | 0.87 | 0.72           | 0.73     | 0.87 |
| ARD       | 3DM-U           | 0.46           | 1.04     | 0.74 |                |          |      |
|           | 3DM-E           | 0.24           | 1.24     | 0.69 |                |          |      |
|           | 3DM-IP          | 0.18           | 1.28     | 0.68 |                |          |      |
|           | morU (0.1,14)   | 0.76           | 0.69     | 0.87 | 0.74           | 0.70     | 0.88 |
|           | morE (0.1,14)   | 0.79           | 0.65     | 0.89 | 0.76           | 0.67     | 0.89 |
|           | morIP (0.1,14)  | 0.77           | 0.68     | 0.88 | 0.76           | 0.68     | 0.88 |
|           | morU (0.21,38)  | 0.78           | 0.67     | 0.88 | 0.72           | 0.73     | 0.86 |
|           | morE (0.38,16)  | 0.80           | 0.63     | 0.90 | 0.76           | 0.67     | 0.89 |
|           | morIP (0.40,22) | 0.82           | 0.61     | 0.90 | 0.74           | 0.70     | 0.87 |
|           | E-C             | 0.74           | 0.73     | 0.86 | 0.72           | 0.73     | 0.86 |
| LASSO     | morU (0.1,14)   | 0.75           | 0.71     | 0.87 | 0.73           | 0.72     | 0.87 |
|           | morE (0.1,14)   | 0.78           | 0.67     | 0.88 | 0.76           | 0.68     | 0.88 |
|           | morIP (0.1,14)  | 0.76           | 0.69     | 0.87 | 0.74           | 0.70     | 0.88 |
|           | morU (0.21,38)  | 0.77           | 0.69     | 0.88 | 0.72           | 0.72     | 0.87 |
|           | morE (0.38,16)  | 0.79           | 0.66     | 0.89 | 0.74           | 0.70     | 0.88 |
|           | morIP (0.40,22) | 0.80           | 0.64     | 0.89 | 0.75           | 0.68     | 0.88 |
|           | E-C             | 0.74           | 0.73     | 0.86 | 0.72           | 0.74     | 0.86 |

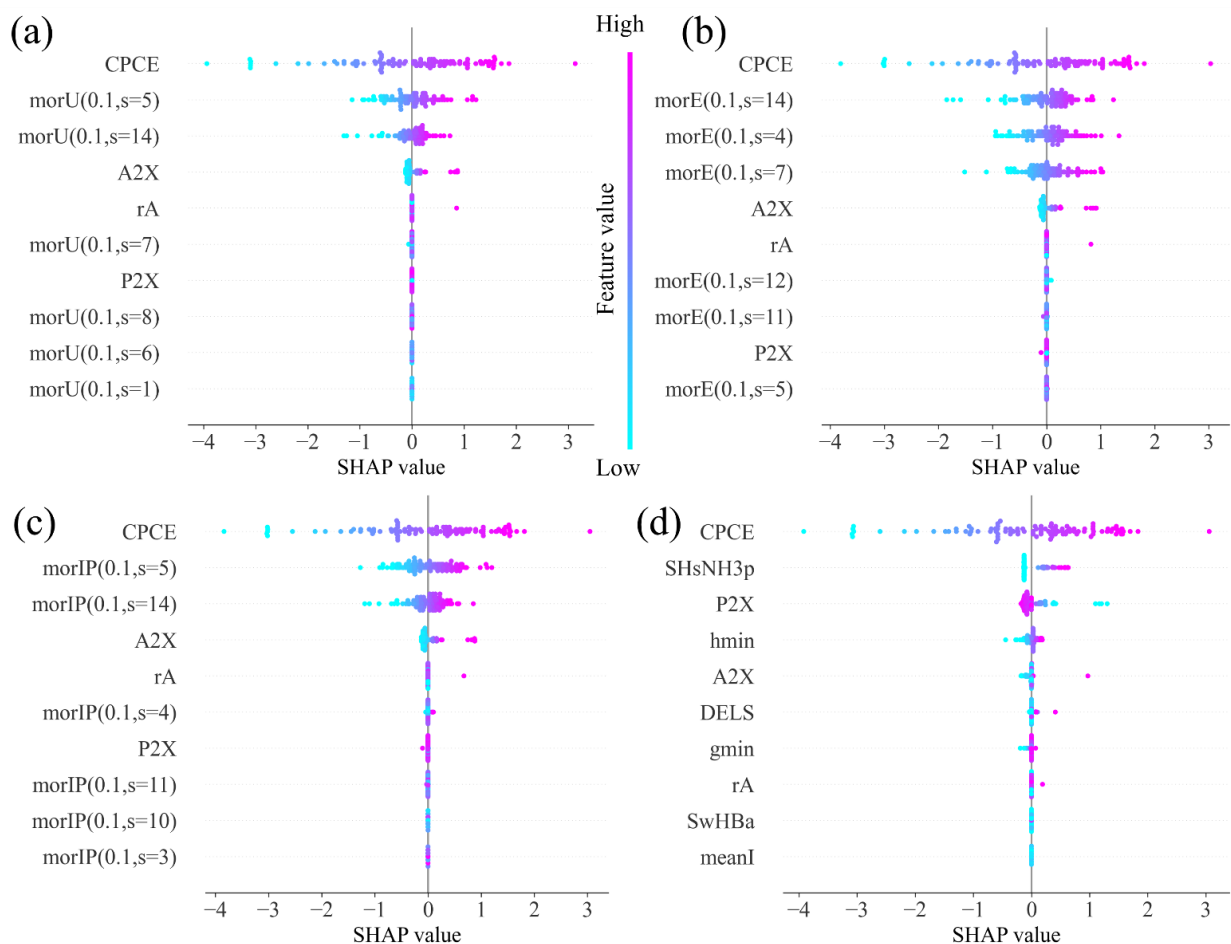

**Fig. S15** The SHAP summary plot for (a) morU (0.1,14), (b) morE (0.1,14), (c) morIP (0.1,14), and E-C descriptor sets implemented in ML with ARD regression. The SHAP values for each sample are obtained by one fitting in the LOO process.

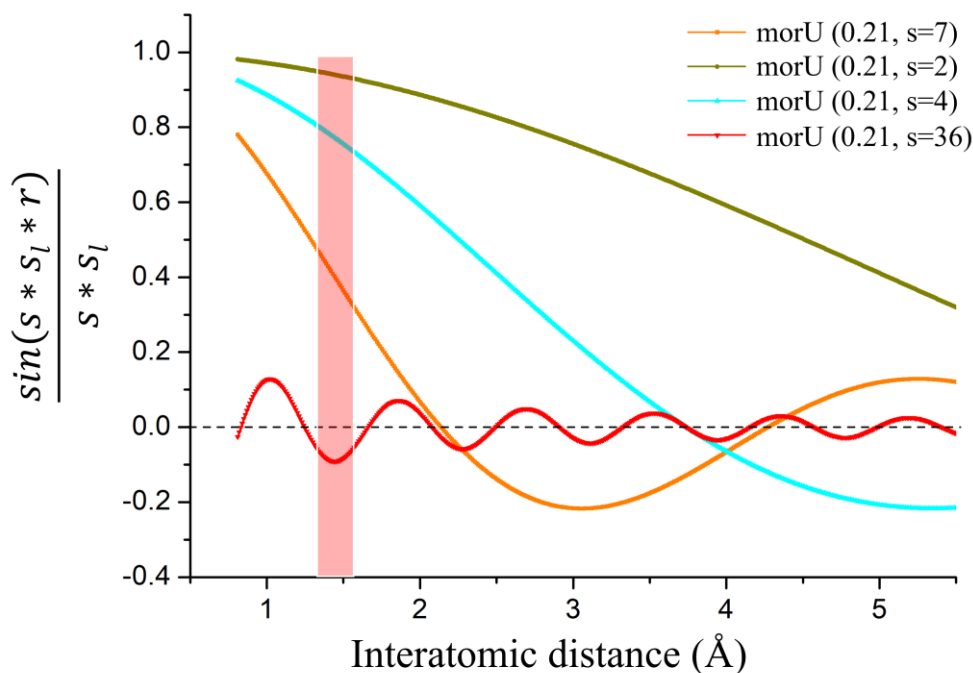

**Fig. S16** The descriptor value of morU (0.21, s=7), morU (0.21, s=2), morU (0.21, s=4) and morU (0.21, s=36). As indicated by SHAP analysis, higher morU (0.21, s=7), morU (0.21, s=2), morU (0.21, s=4) and lower morU (0.21, s=36) should realize high PCE, the first region is shaded red.

**Table S5** The result was predicted by adding molecular descriptors to morIP (0.40,22) and with the LOO method and ARD algorithm.

| Molecular descriptors                            | R <sup>2</sup> | RMSE | r    |
|--------------------------------------------------|----------------|------|------|
| SHBd, SwHBa, SHsNH3p, SHCsats +morIP(0.40,22)    | 0.78           | 0.66 | 0.89 |
| meanI, gmax, gmin, hmax, hmin+morIP(0.40,22)     | 0.79           | 0.65 | 0.89 |
| DELS, fragC+morIP(0.40,22)                       | 0.81           | 0.62 | 0.90 |
| TPSA, AvgIpc, MolLogP+morIP(0.40,22)             | 0.81           | 0.62 | 0.90 |
| BCUT2D_MRHI, BCUT2D_CHGLO, Kappa3+morIP(0.40,22) | 0.77           | 0.67 | 0.88 |
| DM, RE+morIP(0.40,22)                            | 0.81           | 0.61 | 0.90 |
| All in E-C+morIP(0.40,22)                        | 0.75           | 0.71 | 0.87 |
| All in RDKit+morIP(0.40,22)                      | 0.79           | 0.65 | 0.89 |

**Table S6** The molecular descriptors associated with passivation and the best prediction of their values by optimized 3D-MoRSE descriptors, when the scale factor was set from 0.1 to 0.5. ARD algorithm and LOO method were used. The DM and RE were calculated at the level b3lyp/Def2TZVP by Gaussian16<sup>5</sup>.

| Molecular descriptors | Illustration                                                                                      | 3D-MoRSE       | R <sup>2</sup> | RMSE   | r    |
|-----------------------|---------------------------------------------------------------------------------------------------|----------------|----------------|--------|------|
| SHBd                  | The sums of E-states of H-bond donors                                                             | morE (0.5,38)  | 0.60           | 8.14   | 0.78 |
| SwHBa                 | The sums of E-states of weak H-bond acceptors                                                     | morZV (0.5,34) | 0.75           | 8.15   | 0.87 |
| SHsNH3p               | The sums of E-states of H-bonds from NH <sub>3</sub> <sup>+</sup>                                 | morIP (0.3,32) | 0.62           | 0.13   | 0.70 |
| SHCsats               | The sums of E-states of H bonded to saturated C                                                   | morRC (0.4,29) | 0.87           | 1.13   | 0.93 |
| meanI                 | Mean intrinsic state values I                                                                     | morIS (0.1,31) | 0.95           | 0.19   | 0.97 |
| gmax                  | Maximum E-state                                                                                   | morZC (0.1,30) | 0.47           | 2.90   | 0.69 |
| gmin                  | Minimum E-state                                                                                   | morP (0.3,33)  | 0.66           | 1.17   | 0.81 |
| hmax                  | Maximum H E-state                                                                                 | morP (0.3,31)  | 0.80           | 0.17   | 0.89 |
| hmin                  | Minimum H E-state                                                                                 | morP (0.4,29)  | 0.87           | 0.10   | 0.93 |
| DELS                  | The sum of all atom intrinsic state differences                                                   | morZV(0.3,22)  | 0.94           | 6.47   | 0.97 |
| fragC                 | The complexity of the material                                                                    | morZC (0.3,38) | 0.91           | 70.45  | 0.96 |
| TPSA                  | Topological polar surface area                                                                    | morZC (0.4,28) | 0.37           | 21.40  | 0.65 |
| AvgIpc                | Average information content of the characteristic polynomial coefficients of the adjacency matrix | morZV (0.5,36) | 0.67           | 0.09   | 0.82 |
| MolLogP               | Molecular lipid-water partition coefficient                                                       | morP (0.1,35)  | 0.99           | 4.77   | 1.00 |
| BCUT2D_MRHI           | Crippen MR eigenvalue high                                                                        | morM (0.3,30)  | 0.65           | 0.90   | 0.83 |
| BCUT2D_CHGLO          | Gasteiger charge low                                                                              | morU (0.3,39)  | 0.91           | 0.08   | 0.95 |
| Kappa3                | Analysis of the third-order neighborhoods of atoms in the molecular graph                         | morIP (0.3,18) | 0.67           | 906.12 | 0.82 |
| DM                    | Dipole moment                                                                                     | morE (0.3,36)  | 0.20           | 6.18   | 0.46 |
| RE                    | Reorganization energy                                                                             | morV (0.5,39)  | 0.69           | 0.56   | 0.83 |

## Adsorption Energy and Transferred Charge Prediction

Adsorption energy and work function have a certain impact on the passivation effect<sup>6, 7</sup>. Among passivation molecules in the dataset, 86 molecules are small enough to put on the PVK surface model described in our previous work, and their adsorption energies ( $E_{\text{ads}}$ ) and transferred charge ( $N_{\text{tran}}$ ) have been calculated by the previous method<sup>7</sup>. Intermolecular 3D-MoRSE has shown good performance in the prediction of electronic couplings<sup>8</sup>. Therefore, intermolecular optimized 3D-MoRSE may have a good performance on the prediction of  $E_{\text{ads}}$  and  $N_{\text{tran}}$ . The expression of intermolecular optimized 3D-MoRSE is  $\sum_{i=1}^{N_i} \sum_{j=1}^{N_j} A_i A_j f(s, r_{ij})$ , where  $f(s, r_{ij}) = \sin(s * s_L * r_{ij}) / (s * s_L * r_{ij})$ .  $N_i$  represents the number of atoms in molecules,  $N_j$  represents the number of atoms on the PVK surface. As for  $E_{\text{ads}}$ , based on morRC (33,37),  $R^2$  of 0.87 and RMSE of 0.21 have been obtained; Based on morM (13,27),  $R^2$  of 0.86 and RMSE of 0.21 have been obtained. Therefore, a covalent radius has a direct impact on  $E_{\text{ads}}$ . As for  $N_{\text{tran}}$ , based on morM (31,11),  $R^2$  of 0.87 and RMSE of 0.04 have been obtained. The morM descriptor performs well on both of them, which may be due to morM gives Pb atom greater weight. The interaction of Pb with passivation molecules is the most significant<sup>7</sup>.

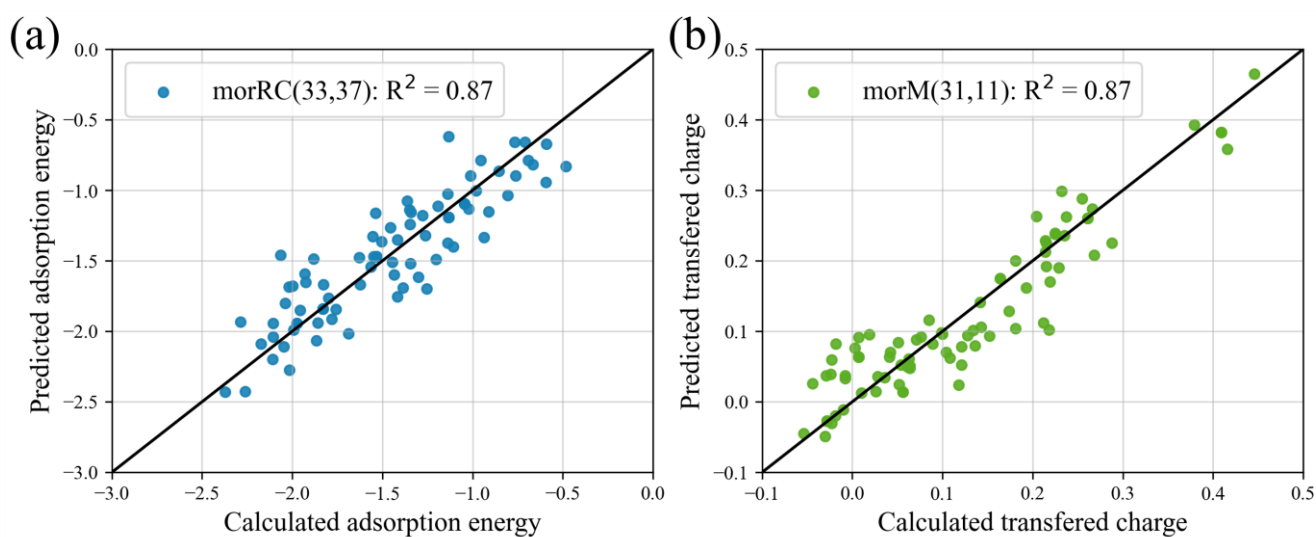

**Fig. S17** ARD model predicted value versus the calculated value of (a)  $E_{\text{ads}}$  and (b)  $N_{\text{tran}}$  based on the LOO method.

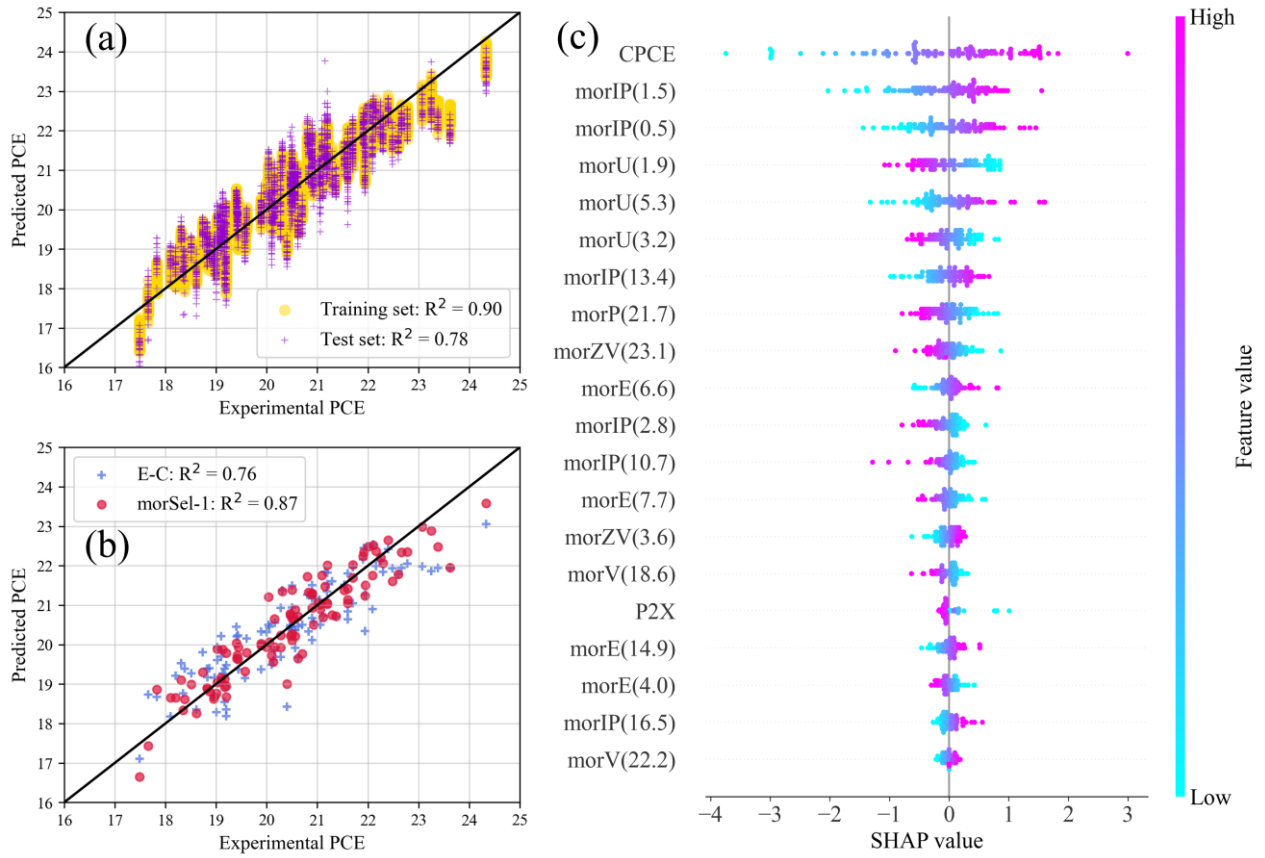

**Fig. S18** The predicted PCE versus experimental PCE based on morSel-1 with (a) 30% samples as test set, and (b) LOO. (c) The SHAP summary plot; The value in the bracket is  $s * s_L$ .

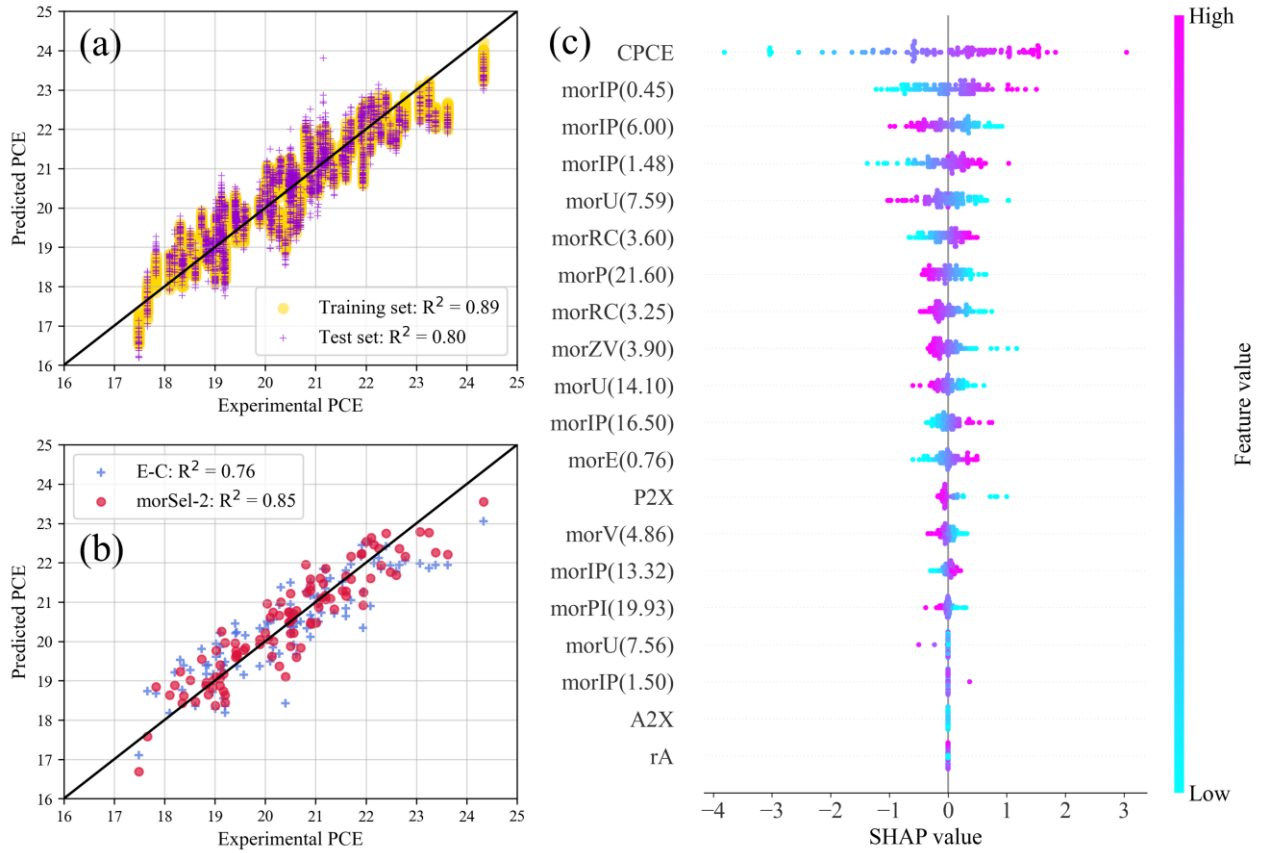

**Fig. S19** The predicted PCE versus experimental PCE based on morSel-2 with (a) 30% samples as test set, and (b) LOO. (c) The SHAP summary plot; The value in the bracket is  $s * s_L$ .

## Attempt of GNN Model

As a promising direction, graph neural networks (GNN) have been widely applied in molecular information extraction and property prediction.<sup>9-11</sup> GNN extracts molecular features based on molecular graphs containing nodes and edges as input. Nodes represent atoms, and edges represent connectivity between different atoms. For comparison and exploration of the potential application of optimized 3D-MoRSE, we set two examples that atomic weights and atomic 3D-MoRSE values were set as node features, respectively, shown in Fig. S20. Torch and torch-geometric packages were utilized<sup>12</sup>. GraphSAGE (Sample and aggregate) model<sup>13</sup> was used in graph convolution layers, and global mean pooling was used in the global pooling layer. The model was evaluated 20 times with different data splits each time (test set: 30%) and the results were averaged. For example A, thirteen atomic weights as shown in Table S1 were set as node features. Two graph convolution layers were added. The  $R^2$  reached 0.65 and RMSE reached 0.83. For example B, the node features were defined as  $\sum_{j=1}^N A_i A_j f(s, r_{ij})$  for  $i^{\text{th}}$  atom, where  $f(s, r_{ij}) = \sin(s * s_L * r_{ij}) / (s * s_L * r_{ij})$  when  $i \neq j$ , and  $f(s, r_{ij}) = 0$  when  $i = j$ . One graph convolution layer was added. The  $R^2$  reached 0.63 and RMSE reached 0.86. As our dataset is too small, applying GNN is relatively inappropriate and did not perform well. However, a potential application for optimized 3D-MoRSE was provided.

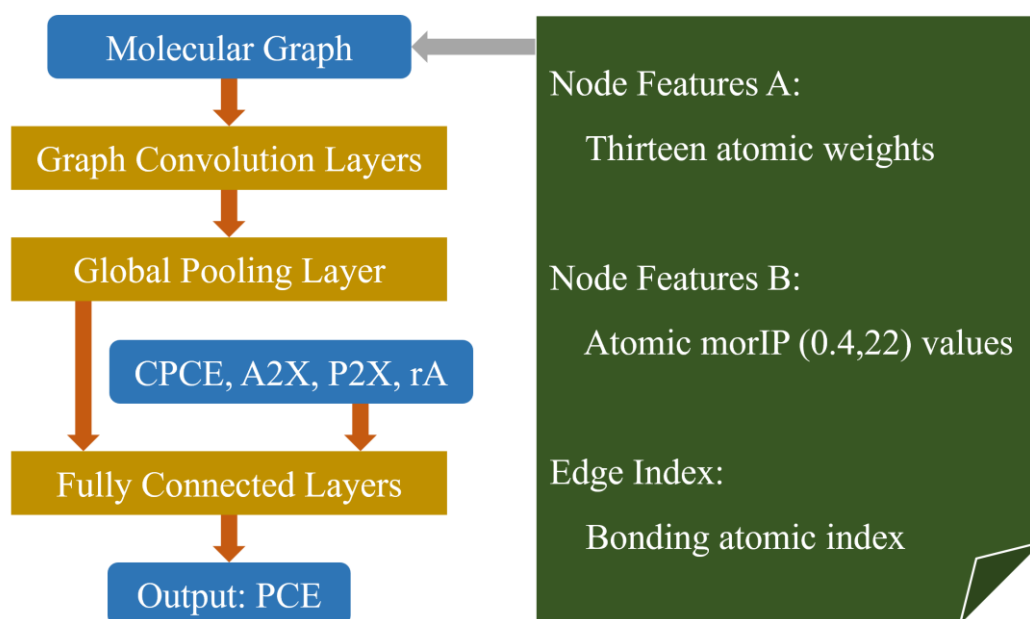

**Fig. S20** Schematic diagram of the GNN models.

## Reference:

1. O. Devinyak, D. Havrylyuk and R. Lesyk, *Journal of Molecular Graphics and Modelling*, 2014, **54**, 194-203.
2. W. Liu, Y. Lu, D. Wei, X. Huo, X. Huang, Y. Li, J. Meng, S. Zhao, B. Qiao, Z. Liang, Z. Xu and D. Song, *Journal of Materials Chemistry A*, 2022, **10**, 17782-17789.
3. L. H. Hall, B. Mohney and L. B. Kier, *Journal of Chemical Information and Computer Sciences*, 1991, **31**, 76-82.
4. C.-G. Zhan, J. A. Nichols and D. A. Dixon, *The Journal of Physical Chemistry A*, 2003, **107**, 4184-4195.
5. M. J. Frisch, G. W. Trucks, H. B. Schlegel, G. E. Scuseria, M. A. Robb, J. R. Cheeseman, G. Scalmani, V. Barone, G. A. Petersson, H. Nakatsuji, X. Li, M. Caricato, A. V. Marenich, J. Bloino, B. G. Janesko, R. Gomperts, B. Mennucci, H. P. Hratchian, J. V. Ortiz, A. F. Izmaylov, J. L. Sonnenberg, D. Williams-Young, F. Ding, F. Lipparini, F. Egidi, J. Goings, B. Peng, A. Petrone, T. Henderson, D. Ranasinghe, V. G. Zakrzewski, J. Gao, N. Rega, G. Zheng, W. Liang, M. Hada, M. Ehara, K. Toyota, R. Fukuda, J. Hasegawa, M. Ishida, T. Nakajima, Y. Honda, O. Kitao, H. Nakai, T. Vreven, K. Throssell, J. A. Montgomery Jr., J. E. Peralta, F. Ogliaro, M. J. Bearpark, J. J. Heyd, E. N. Brothers, K. N. Kudin, V. N. Staroverov, T. A. Keith, R. Kobayashi, J. Normand, K. Raghavachari, A. P. Rendell, J. C. Burant, S. S. Iyengar, J. Tomasi, M. Cossi, J. M. Millam, M. Klene, C. Adamo, R. Cammi, J. W. Ochterski, R. L. Martin, K. Morokuma, O. Farkas, J. B. Foresman and D. J. Fox, *Journal*, 2016.
6. W. Zhang, Q.-S. Li and Z.-S. Li, *Applied Surface Science*, 2021, **563**, 150267.
7. X. Ye, W. Ou, B. Ai and Y. Zhou, *Physical Chemistry Chemical Physics*, 2023, **25**, 32250-32260.
8. J. Ma, Z. Du, Z. Lei, L. Wang, Y. Yu, X. Ye, W. Ou, X. Wei, B. Ai and Y. Zhou, *Journal of Chemical Information and Modeling*, 2023, **63**, 5089-5096.
9. X. Fang, L. Liu, J. Lei, D. He, S. Zhang, J. Zhou, F. Wang, H. Wu and H. Wang, *Nature Machine Intelligence*, 2022, **4**, 127-134.
10. Y. Wang, J. Wang, Z. Cao and A. Barati Farimani, *Nature Machine Intelligence*, 2022, **4**, 279-287.
11. C. W. Coley, R. Barzilay, W. H. Green, T. S. Jaakkola and K. F. Jensen, *J Chem Inf Model*, 2017, **57**, 1757-1772.
12. M. Fey and J. E. Lenssen, *Journal*, 2019, DOI: 10.48550/arXiv.1903.02428, arXiv:1903.02428.
13. W. L. Hamilton, R. Ying and J. Leskovec, *Journal*, 2017, DOI: 10.48550/arXiv.1706.02216, arXiv:1706.02216.
